# Supplementary material for: Towards Controlling the Glycoform: A Model Framework Linking Extracellular Metabolites to Antibody Glycosylation
Source: MDPI journal article supplement (doi:10.3390/ijms15034492), 2014-03-14
Supplement: s1 [file s1]

## Sheet: Sheet1
Enzyme	Reaction	Substrates / Inhibitors	Kinetic Mechanism	Km	kcat	KI	Acitivity (purified)	Hill coefficient	Species/tissue	Referrence	Comments
2.7.1.1 - Hexokinase	r1a	Glucose	Ordered bi-bi mechanism	0.11 mM					29°C, pH 8.0, rattus norvegicus, skeletal muscle	http://www.biochemj.org/bj/100/0739/1000739.pdf
2.7.1.1 - Hexokinase	r1a	ATP (Binds before glucose)	Ordered bi-bi mechanism	0.8 mM					29°C, pH 8.0, rattus norvegicus, skeletal muscle	http://www.biochemj.org/bj/100/0739/1000739.pdf
2.7.1.1 - Hexokinase	r1a	D-Glucose	Ordered bi-bi mechanism				120 (µM/min/mg protein)		30°C, pH 7.5, rattus norvegicus, skeletal muscle	http://www.sciencedirect.com/science/article/pii/S0076687982900982
2.7.1.1 - Hexokinase	r1a	ATP	Ordered bi-bi mechanism		53.2 /s				37°C, pH 7.4, mus musculus	http://www.jbc.org/content/282/18/13906.full.pdf+html
2.7.1.1 - Hexokinase	r1a	Fructose (competitive with Glc)	Ordered bi-bi mechanism			0.9 mM			30°C, pH 7.5, rattus norvegicus, skeletal muscle	http://www.sciencedirect.com/science/article/pii/S0076687982900982
2.7.1.1 - Hexokinase	r1a	Glucosamine (competitive with Glc)	Ordered bi-bi mechanism			0.06 mM			30°C, pH 7.5, rattus norvegicus, skeletal muscle	http://www.sciencedirect.com/science/article/pii/S0076687982900982
2.7.1.1 - Hexokinase	r1a	Mannose (competitive with Glc)	Ordered bi-bi mechanism			0.06 mM			30°C, pH 7.5, rattus norvegicus, skeletal muscle	http://www.sciencedirect.com/science/article/pii/S0076687982900982
2.7.1.1 - Hexokinase	r1a	Glc6 (non-competitive with hexose)	Ordered bi-bi mechanism			0.026 mM			30°C, pH 7.5, Rattus norvegicus	http://ac.els-cdn.com/S0076687982900982/1-s2.0-S0076687982900982-main.pdf?_tid=06f150b839f8719f984c766779abb6de&acdnat=1336482973_8a49f0e1aa7bef0ec914ad9555cbd118
2.7.1.1 - Hexokinase	r1a	Glc6 (non-competitive with ATP)	Ordered bi-bi mechanism			0.015 mM			30°C, pH 7.5, Rattus norvegicus	http://ac.els-cdn.com/S0076687982900982/1-s2.0-S0076687982900982-main.pdf?_tid=06f150b839f8719f984c766779abb6de&acdnat=1336482973_8a49f0e1aa7bef0ec914ad9555cbd118
2.7.1.1 - Hexokinase	r1a	Glc6 (enzyme only)	Ordered bi-bi mechanism			0.043 mM			30°C, pH 7.5, Rattus norvegicus	http://ac.els-cdn.com/S0076687982900982/1-s2.0-S0076687982900982-main.pdf?_tid=06f150b839f8719f984c766779abb6de&acdnat=1336482973_8a49f0e1aa7bef0ec914ad9555cbd118
2.7.1.1 - Hexokinase	r1a	ADP (competitive with ATP)	Ordered bi-bi mechanism			3.5 mM			30°C, pH 7.5, Rattus norvegicus	http://ac.els-cdn.com/S0076687982900982/1-s2.0-S0076687982900982-main.pdf?_tid=06f150b839f8719f984c766779abb6de&acdnat=1336482973_8a49f0e1aa7bef0ec914ad9555cbd118
2.7.1.2 - Glucokinase	r1c	D-glucose	Ordered mnemonical bi-bi	6 mM			80 µM/min/mg	1.73	30°C, pH 7.5, Homo Sapiens, liver	http://www.jbc.org/content/270/17/9939.long
2.7.1.2 - Glucokinase	r1c	ATP	Ordered mnemonical bi-bi	0.63 mM					30°C, pH 7.5, Homo Sapiens, liver	http://www.jbc.org/content/270/17/9939.long
2.7.1.2 - Glucokinase	r1c	Glc6P (competitive with Hexose)	Ordered mnemonical bi-bi			12 mM			30°C, pH 7.5, Homo Sapiens, liver	http://www.jbc.org/content/270/17/9939.long
2.7.1.2 - Glucokinase	r1c	GlcNAc (competitive with Hexose	Ordered mnemonical bi-bi			0.2 mM			30°C, pH 7.5, Homo Sapiens, liver	http://www.jbc.org/content/270/17/9939.long
2.7.1.2 - Glucokinase	r1c	ADP (competitive with ATP)	Ordered mnemonical bi-bi			9 mM			30°C, pH 8.0, Rattus norvegicus, liver	http://www.ncbi.nlm.nih.gov/pmc/articles/PMC1164869/pdf/biochemj00507-0070.pdf
2.7.1.2 - Glucokinase	r1c	Mannose (competitive with Glc)				4.4 mM			30°C, pH 7.5, Homo Sapiens, liver	http://www.jbc.org/content/270/17/9939.long
2.7.1.2 - Glucokinase	r1c				66.7 /s				30°C, pH 7.5, Homo Sapiens, liver	http://www.jbc.org/content/269/44/27458.full.pdf
5.3.1.9 - Glucose-6-phosphate isomerase	r2a		Push-pull mechanism (Michaelis-Menten)						mus musculus	http://www.ncbi.nlm.nih.gov/pubmed/15342241
5.3.1.9 - Glucose-6-phosphate isomerase	r2aF	Glucose-6-P	Push-pull mechanism (Michaelis-Menten)	0.25 mM					30C, pH 8.5, mus musculus, Ehrlich ascites tumor cells	http://www.sciencedirect.com/science/article/pii/0014579373801668
5.3.1.9 - Glucose-6-phosphate isomerase	r2aF	D-Glucose-6-P	Push-pull mechanism (Michaelis-Menten)		1000 /s				30C, pH 7.5, homo sapiens, liver	http://www.sciencedirect.com/science/article/pii/S1570963908003531
5.3.1.9 - Glucose-6-phosphate isomerase	r2aB	D-Fructose-6-P	Push-pull mechanism (Michaelis-Menten)	0.037 mM	650 /s				30C, pH 7.5, homo sapiens, liver	http://www.sciencedirect.com/science/article/pii/S1570963908003531
2.6.1.16 - glutamine-fructose-6-phosphate transaminase	r3a	Glutamine (second to bind)	Ordered bi-bi mechanism	0.8 mM	1.08 /s (as calculated from specific activity)		200 pmol/min/mg		37°C, pH 7.5, rat, liver	http://www.sciencedirect.com/science/article/pii/S0003986100918952	kcat based on homogeneous protein with a Mr of 75 kDa
2.6.1.16 - glutamine-fructose-6-phosphate transaminase	r3a	Fru-6-P (first to bind)	Ordered bi-bi mechanism	0.4 mM					37°C, pH 7.5, rat, liver	http://www.sciencedirect.com/science/article/pii/S0003986100918952
2.6.1.16 - glutamine-fructose-6-phosphate transaminase	r3a		Ordered bi-bi mechanism			0.0183 mM			37°C, pH 7.5, rat, liver	http://www.sciencedirect.com/science/article/pii/S0003986100918952
2.6.1.16 - glutamine-fructose-6-phosphate transaminase	r3a		Ordered bi-bi mechanism							http://www.sciencedirect.com/science/article/pii/S0167483802003187
3.5.99.6 - glucosamine-6-phosphate deaminase	r3b	GlcNAc-6-P (Allosteric activator of the V-type)	Bireactant sequential mechanism	0.0175 mM	61.6 /s				30C, pH 7.7, bos taurus, kidney	http://www.sciencedirect.com/science/article/pii/S0167483898001411	Michaelis-Menten activation kinetics
3.5.99.6 - glucosamine-6-phosphate deaminase	r3b	GlcN-6P	Bireactant sequential mechanism	0.65 mM	61.6 /s				30C, pH 7.7, bos taurus, kidney	http://www.sciencedirect.com/science/article/pii/S0167483898001411
2.3.1.4 - glucosamine-phosphate N-acetyltransferase	r4a		Ping pong bi-bi mechanism						37C, pH 7.4, rattus norvegicus	http://www-06.all-portland.net/bst/012/0656/0120656.pdf
2.3.1.4 - glucosamine-phosphate N-acetyltransferase	r4a	CoA (competitive with actyl-CoA	Ping pong bi-bi mechanism			0.05 - 0.15 mM			37C, pH 7.4, rattus norvegicus	http://www-06.all-portland.net/bst/012/0656/0120656.pdf
2.3.1.4 - glucosamine-phosphate N-acetyltransferase	r4a	GlcN-6-P	Ping pong bi-bi mechanism	0.040 mM					37°C, pH 7.5, mus musculus	http://www.jbc.org/content/275/17/12821.full.pdf+html
2.3.1.4 - glucosamine-phosphate N-acetyltransferase	r4a	acetyl-CoA	Ping pong bi-bi mechanism	0.120 mM					37°C, pH 7.5, mus musculus	http://www.jbc.org/content/275/17/12821.full.pdf+html
2.3.1.4 - glucosamine-phosphate N-acetyltransferase	r4a	GlcN-6-P	Ping pong bi-bi mechanism		22.1 /s				30C, pH 8.0, homo sapiens	http://www.sciencedirect.com/science/article/pii/S0014579308006406
3.5.1.25 - N-acetylglucosamine-6-phosphate deacetylase	r4b	GlcNAc-6-P	Michaelis-Menten	0.029 mM	0.04 /s		1.4*10^6 cpm/h/mg		37°C, pH 7.5, homo sapiens, erythrocyte	http://onlinelibrary.wiley.com/doi/10.1046/j.1365-2141.1996.d01-1955.x/pdf	16,000-fold purified was assumed to be pure enzyme
5.4.2.3 - phosphoacetylglucosamine mutase	r5aF	GlcNAc-6-P	Ping-Pong bi-bi mechanism	0.046 mM	1.8 /s				30°C, pH 8.3, homo sapiens, expressed in E. Coli	http://www.sciencedirect.com/science/article/pii/S0167478100001202
5.4.2.3 - phosphoacetylglucosamine mutase	r5aB	GlcNAc-1-P	Ping-Pong bi-bi mechanism		1.8 /s (assumed same as forward)				37°C, pH 7.5, sus scrofa, submaxillary gland	http://www.jbc.org/content/254/17/8353.long
5.4.2.3 - phosphoacetylglucosamine mutase	r5aB	GlcNAc-1-P	Ping-Pong bi-bi mechanism	0.024 mM					37°C, pH 7.5, sus scrofa, submaxillary gland	http://www.jbc.org/content/254/17/8353.long	vm data read from graph in supplementary material
5.4.2.3 - phosphoacetylglucosamine mutase	r5aB	GlcNAc-1-P	Ping-Pong bi-bi mechanism			0.023 mM			37°C, pH 7.5, sus scrofa, submaxillary gland	http://www.jbc.org/content/254/17/8353.long
5.4.2.3 - phosphoacetylglucosamine mutase	r5aB	GlcNAc-1,6-P2 (intermediate)	Ping-Pong bi-bi mechanism	0.00038 mM					37°C, pH 7.5, sus scrofa, submaxillary gland	http://www.jbc.org/content/254/17/8353.long
5.4.2.3 - phosphoacetylglucosamine mutase	r5aB	Glc-1,6-P2 (intermediate)	Ping-Pong bi-bi mechanism	0.028 mM					37°C, pH 7.5, sus scrofa, submaxillary gland	http://www.jbc.org/content/254/17/8353.long
					111600
2.7.7.23 - UDP-N-acetylglucosamine diphsophorylase	r6aF	UTP (binds second)	Ping-Pong bi-bi mechanism	0.42 mM					37°C, pH 7.5, sus scrofa, liver	http://www.jbc.org/content/271/22/13147.full.pdf+html
2.7.7.23 - UDP-N-acetylglucosamine diphsophorylase	r6aF	GlcNAc-1-P (binds first)	Ping-Pong bi-bi mechanism	0.29 mM	31 /s (as calculated from specific activity)				37°C, pH 7.5, sus scrofa, liver	http://www.jbc.org/content/271/22/13147.full.pdf+html	kcat based on homogeneous protein with a Mr of 125kDa
2.7.7.23 - UDP-N-acetylglucosamine diphsophorylase	r6aF	GalNAc-1-P (competes with GlcNAc-1-P)	Ping-Pong bi-bi mechanism			1.1 mM			37°C, pH 7.5, sus scrofa, liver	http://www.jbc.org/content/271/22/13147.full.pdf+html
2.7.7.23 - UDP-N-acetylglucosamine diphsophorylase	r6aF	Glc-1-P (competes with GlcNAc-1-P)	Ping-Pong bi-bi mechanism			5.8 mM			37°C, pH 7.5, sus scrofa, liver	http://www.jbc.org/content/271/22/13147.full.pdf+html
2.7.7.23 - UDP-N-acetylglucosamine diphsophorylase	r6aF		Ping-Pong bi-bi mechanism							http://www.jbc.org/content/273/23/14392.full.pdf
2.7.7.23 - UDP-N-acetylglucosamine diphsophorylase	r6aB	ADP	Ping-Pong bi-bi mechanism	0.79 mM					37°C, pH 7.4, ovis aries, brain	http://www.brenda-enzymes.org/literature/lit.php4?e=2.7.7.23&r=643057
2.7.7.23 - UDP-N-acetylglucosamine diphsophorylase	r6aB	UDP-GlcNAc (5 mM Ppi)	Ping-Pong bi-bi mechanism	0.23 mM	31 /s (assumed same as forward)				37°C, pH 8.5, sus scrofa, liver	http://www.jbc.org/content/271/22/13147.full.pdf+html
2.7.7.23 - UDP-N-acetylglucosamine diphsophorylase	r6aB	UDP-GalNAc (competes with UDP-GlcNAc)	Ping-Pong bi-bi mechanism			2.2 mM			37°C, pH 8.5, sus scrofa, liver	http://www.jbc.org/content/271/22/13147.full.pdf+html
2.7.7.23 - UDP-N-acetylglucosamine diphsophorylase	r6aB	UDP-Glc (competes with UDP-GlcNAc)	Ping-Pong bi-bi mechanism			6.3 mM			37°C, pH 8.5, sus scrofa, liver	http://www.jbc.org/content/271/22/13147.full.pdf+html
5.1.3.7 - UDP-N-acetylglucosamine 4-epimerase	r7a	Although activity has been reported in mammalian cells no kinetic data can be found for this enzyme					200 nmol/hr/mg		37°C, pH 8.4, CHO cells	http://www.sciencedirect.com/science/article/pii/009286748690841X
5.1.3.2 - UDP-glucose 4-epimerase	r7bB	UDP-GalNAc	Single substrate Michaelis-Menten mechanism		26 /s (based on repored activity ratios and UDP-Gal turnover)		36.4 µM/min/mg protein		37°C, pH 8.7, homo sapiens, expressed in Saccharomyces	http://www.jbc.org/content/279/31/32796.full.pdf
5.1.3.2 - UDP-glucose 4-epimerase	r7bB	UDP-GalNAc	Single substrate Michaelis-Menten mechanism	0.29 mM					37°C, pH 8.7, homo sapiens, expressed in Saccharomyces	http://www.jbc.org/content/276/23/20617.full.pdf+html
5.1.3.2 - UDP-glucose 4-epimerase	r7bB	UDP-Gal	Single substrate Michaelis-Menten mechanism			0.048 mM			Homo sapiens, expressed in Saccharomyces	http://ac.els-cdn.com/S1074552102000935/1-s2.0-S1074552102000935-main.pdf?_tid=68bdd139aaee08f025efafe0022c3dbf&acdnat=1336068604_07e825abfeaf1ed5dd7ab93c95783d14
5.1.3.2 - UDP-glucose 4-epimerase	r7bF	UDP-GlcNAc	Single substrate Michaelis-Menten mechanism	0.53 mM (based on UDP-GalNAc/UDP-GlcNAc ratio)	26 /s (assumed same as forward)				37°C, pH 7.8, CHO-K1	http://onlinelibrary.wiley.com/doi/10.1002/bit.21816/abstract	An average UDP-GalNAc/UDP-GlcNAc of 0.551 was calculated
5.1.3.2 - UDP-glucose 4-epimerase	r7bF	UDP-GlcNAc	Single substrate Michaelis-Menten mechanism	UDP-Glc equilibrates 4-fold faster than UDP-GlcNAc					Homo sapiens	http://www.biochemj.org/bj/389/0173/3890173.pdf
5.1.3.2 - UDP-glucose 4-epimerase	r7bF	UDP-GlcNAc	Single substrate Michaelis-Menten mechanism	UDP-GlcNAc to UDP-GalNAc ratios during different stages of cell cycle					CHO	http://www.jbc.org/content/280/14/13493.full.pdf
5.1.3.2 - UDP-glucose 4-epimerase	r7bF	UDP-Glc	Single substrate Michaelis-Menten mechanism			0.020 mM			Homo sapiens, expressed in Saccharomyces	http://ac.els-cdn.com/S1074552102000935/1-s2.0-S1074552102000935-main.pdf?_tid=68bdd139aaee08f025efafe0022c3dbf&acdnat=1336068604_07e825abfeaf1ed5dd7ab93c95783d14
2.7.1.59 - N-acetylglucosamine kinase	r8a	GlcNAc	Random order (assumed)	0.2 mM					37°C, pH 7.5, mus musculus, spleen	http://onlinelibrary.wiley.com/doi/10.1046/j.1432-1327.2000.01360.x/pdf	Activity: 12 (kidney), 4 (liver)
2.7.1.59 - N-acetylglucosamine kinase	r8a	ATP	Random order (assumed)	0.5 mM					37°C, pH 7.5, mus musculus, spleen	http://onlinelibrary.wiley.com/doi/10.1046/j.1432-1327.2000.01360.x/pdf
2.7.1.59 - N-acetylglucosamine kinase	r8a	GlcNAc (co-operative kinetics)	Random order (assumed)					1.54	32°C, pH 7.5, rattus norvegicus, kindey and liver	http://www.ncbi.nlm.nih.gov/pmc/articles/PMC1161433/pdf/biochemj00430-0042.pdf
2.7.1.59 - N-acetylglucosamine kinase	r8a	GlcNAc	Random order (assumed)		68.1 /s		52.4 μmol/min/mg		37°C, pH 7.5, rattus norvegicus, liver	http://onlinelibrary.wiley.com/doi/10.1046/j.1432-1327.1998.2520133.x/pdf	Obtained from specific activity data and Mr of 78 kDa
2.7.1.59 - N-acetylglucosamine kinase	r8a	ADP (competitive with ATP)	Random order (assumed)			0.9 mM			37°C, pH 9.0, sus scrofa, liver	http://www.sciencedirect.com/science/article/pii/0005274470902287
2.7.1.59 - N-acetylglucosamine kinase	r8a	ManNAc	Random order (assumed)			4 mM			37°C, pH 7.5, mus musculus, spleen	http://onlinelibrary.wiley.com/doi/10.1046/j.1432-1327.2000.01360.x/pdf
2.7.1.2 - Glucokinase	r8b	GlcNAc	Ordered bi-bi mechanism	0.20 mM					30°C, pH 7.5, Homo Sapiens, liver	http://www.jbc.org/content/270/17/9939.long	No effect on co-operativity
2.7.1.2 - Glucokinase	r8b	ATP	Ordered bi-bi mechanism	0.63 mM					30°C, pH 7.5, Homo Sapiens, liver	http://www.jbc.org/content/270/17/9939.long
2.7.1.2 - Glucokinase	r8b	D-glucose (competitive with Hexose)	Ordered bi-bi mechanism			6.0 mM			30°C, pH 7.5, Homo Sapiens, liver	http://www.jbc.org/content/270/17/9939.long
2.7.1.2 - Glucokinase	r8b	Glc6P (competitive with Hexose)	Ordered bi-bi mechanism			12 mM			30°C, pH 7.5, Homo Sapiens, liver	http://www.jbc.org/content/270/17/9939.long	No effect on co-operativity
2.7.1.2 - Glucokinase	r8b	Mannose (competitive with Hexose)	Ordered bi-bi mechanism			4.4 mM			30°C, pH 7.5, Homo Sapiens, liver	http://www.jbc.org/content/270/17/9939.long
2.7.1.2 - Glucokinase	r8b	ADP (competitive with ATP)	Ordered bi-bi mechanism			9.0 mM			30°C, pH 8.0, Rattus norvegicus, liver	http://www.ncbi.nlm.nih.gov/pmc/articles/PMC1164869/pdf/biochemj00507-0070.pdf	No effect on co-operativity
2.7.1.2 - Glucokinase	r8b				66.7 /s				30°C, pH 7.5, Homo Sapiens, liver	http://www.jbc.org/content/269/44/27458.full.pdf
3.5.1.33 - N-acetylglucosamine deacetylase	r9a	Although reported in mammalian cells no kinetic data can be found for this enzyme								http://www.jbc.org/content/266/14/8671.long
2.3.1.3 - Glucosamine N-acetyltransferase	r9b	Although reported in pidgeons no kinetic data can be found for this enzyme								http://www.jbc.org/content/196/1/105.long
2.7.1.1 - Hexokinase	r10a	Glucosamine	Ordered bi-bi mechanism	0.06 mM	53.2 /s (assumed to be the same as for Glc)				30°C, pH 7.5, rattus norvegicus, skeletal muscle	http://www.sciencedirect.com/science/article/pii/S0076687982900982
2.7.1.1 - Hexokinase	r10a	ATP (Binds before glucose)	Ordered bi-bi mechanism	0.8 mM					29°C, pH 8.0, rattus norvegicus, skeletal muscle	http://www.biochemj.org/bj/100/0739/1000739.pdf
2.7.1.1 - Hexokinase	r10a	D-Glucose	Ordered bi-bi mechanism				120 (µM/min/mg protein)		30°C, pH 7.5, rattus norvegicus, skeletal muscle	http://www.sciencedirect.com/science/article/pii/S0076687982900982
2.7.1.1 - Hexokinase	r10a	ATP	Ordered bi-bi mechanism						37°C, pH 7.4, mus musculus	http://www.jbc.org/content/282/18/13906.full.pdf+html
2.7.1.1 - Hexokinase	r10a	Glucose (competitive with GlcN)	Ordered bi-bi mechanism			0.11 mM			29°C, pH 8.0, rattus norvegicus, skeletal muscle	http://www.biochemj.org/bj/100/0739/1000739.pdf
2.7.1.1 - Hexokinase	r10a	Fructose (competitive with GlcN)	Ordered bi-bi mechanism			0.9 mM			30°C, pH 7.5, rattus norvegicus, skeletal muscle	http://www.sciencedirect.com/science/article/pii/S0076687982900982
2.7.1.1 - Hexokinase	r10a	Mannose (competitive with GlcN)	Ordered bi-bi mechanism			0.06 mM			30°C, pH 7.5, rattus norvegicus, skeletal muscle	http://www.sciencedirect.com/science/article/pii/S0076687982900982
2.7.1.1 - Hexokinase	r10a	Glc6 (non-competitive with hexose)	Ordered bi-bi mechanism			0.026 mM			30°C, pH 7.5, Rattus norvegicus	http://ac.els-cdn.com/S0076687982900982/1-s2.0-S0076687982900982-main.pdf?_tid=06f150b839f8719f984c766779abb6de&acdnat=1336482973_8a49f0e1aa7bef0ec914ad9555cbd118
2.7.1.1 - Hexokinase	r10a	Glc6 (non-competitive with ATP)	Ordered bi-bi mechanism			0.015 mM			30°C, pH 7.5, Rattus norvegicus	http://ac.els-cdn.com/S0076687982900982/1-s2.0-S0076687982900982-main.pdf?_tid=06f150b839f8719f984c766779abb6de&acdnat=1336482973_8a49f0e1aa7bef0ec914ad9555cbd118
2.7.1.1 - Hexokinase	r10a	Glc6 (enzyme only)	Ordered bi-bi mechanism			0.043 mM			30°C, pH 7.5, Rattus norvegicus	http://ac.els-cdn.com/S0076687982900982/1-s2.0-S0076687982900982-main.pdf?_tid=06f150b839f8719f984c766779abb6de&acdnat=1336482973_8a49f0e1aa7bef0ec914ad9555cbd118
2.7.1.1 - Hexokinase	r10a	ADP (competitive with ATP)	Ordered bi-bi mechanism			3.5 mM			30°C, pH 7.5, Rattus norvegicus	http://ac.els-cdn.com/S0076687982900982/1-s2.0-S0076687982900982-main.pdf?_tid=06f150b839f8719f984c766779abb6de&acdnat=1336482973_8a49f0e1aa7bef0ec914ad9555cbd118
2.7.1.1 - Hexokinase	r11a	Fructose	Ordered bi-bi mechanism	0.9 mM	53.2 /s (assumed to be the same as for Glc)				30°C, pH 7.5, rattus norvegicus, skeletal muscle	http://www.sciencedirect.com/science/article/pii/S0076687982900982
2.7.1.1 - Hexokinase	r11a	ATP (Binds before glucose)	Ordered bi-bi mechanism	0.8 mM					29°C, pH 8.0, rattus norvegicus, skeletal muscle	http://www.biochemj.org/bj/100/0739/1000739.pdf
2.7.1.1 - Hexokinase	r11a	D-Glucose	Ordered bi-bi mechanism				120 (µM/min/mg protein)		30°C, pH 7.5, rattus norvegicus, skeletal muscle	http://www.sciencedirect.com/science/article/pii/S0076687982900982
2.7.1.1 - Hexokinase	r11a	ATP	Ordered bi-bi mechanism						37°C, pH 7.4, mus musculus	http://www.jbc.org/content/282/18/13906.full.pdf+html
2.7.1.1 - Hexokinase	r11a	Glucose (competitive with Fru)	Ordered bi-bi mechanism			0.11 mM			29°C, pH 8.0, rattus norvegicus, skeletal muscle	http://www.biochemj.org/bj/100/0739/1000739.pdf
2.7.1.1 - Hexokinase	r11a	Glucosamine (competitive with Fru)	Ordered bi-bi mechanism			0.06 mM			30°C, pH 7.5, rattus norvegicus, skeletal muscle	http://www.sciencedirect.com/science/article/pii/S0076687982900982
2.7.1.1 - Hexokinase	r11a	Mannose (competitive with Fru)	Ordered bi-bi mechanism			0.06 mM			30°C, pH 7.5, rattus norvegicus, skeletal muscle	http://www.sciencedirect.com/science/article/pii/S0076687982900982
2.7.1.1 - Hexokinase	r11a	Glc6 (non-competitive with hexose)	Ordered bi-bi mechanism			0.026 mM			30°C, pH 7.5, Rattus norvegicus	http://ac.els-cdn.com/S0076687982900982/1-s2.0-S0076687982900982-main.pdf?_tid=06f150b839f8719f984c766779abb6de&acdnat=1336482973_8a49f0e1aa7bef0ec914ad9555cbd118
2.7.1.1 - Hexokinase	r11a	Glc6 (non-competitive with ATP)	Ordered bi-bi mechanism			0.015 mM			30°C, pH 7.5, Rattus norvegicus	http://ac.els-cdn.com/S0076687982900982/1-s2.0-S0076687982900982-main.pdf?_tid=06f150b839f8719f984c766779abb6de&acdnat=1336482973_8a49f0e1aa7bef0ec914ad9555cbd118
2.7.1.1 - Hexokinase	r11a	Glc6 (enzyme only)	Ordered bi-bi mechanism			0.043 mM			30°C, pH 7.5, Rattus norvegicus	http://ac.els-cdn.com/S0076687982900982/1-s2.0-S0076687982900982-main.pdf?_tid=06f150b839f8719f984c766779abb6de&acdnat=1336482973_8a49f0e1aa7bef0ec914ad9555cbd118
2.7.1.1 - Hexokinase	r11a	ADP (competitive with ATP)	Ordered bi-bi mechanism			3.5 mM			30°C, pH 7.5, Rattus norvegicus	http://ac.els-cdn.com/S0076687982900982/1-s2.0-S0076687982900982-main.pdf?_tid=06f150b839f8719f984c766779abb6de&acdnat=1336482973_8a49f0e1aa7bef0ec914ad9555cbd118
2.7.1.52 - Fucokinase	r12a	L-fucose (at 5mM ATP)	Random order bi-bi (assumed)	0.027 mM	9.3 /s		1270 nmol/min/mg		37°C, pH 8.0, sus scrofa, kidney	http://www.jbc.org/content/273/10/5685.full.pdf+html	kcat obtained from specific activity assumed to be of homogeneous enzyme and an Mr of 440kDa
2.7.1.52 - Fucokinase	r12a	ATP (at 0.1 mM Fucose)	Random order bi-bi (assumed)	0.6 mM					37°C, pH 8.0, sus scrofa, kidney	http://www.jbc.org/content/273/10/5685.full.pdf+html
2.7.1.52 - Fucokinase	r12a	GDP-fucose (data suggest non-competitive inhibition)	Random order bi-bi (assumed)			0.01 mM			37°C, pH 8.0, sus scrofa, kidney	http://www.jbc.org/content/273/10/5685.full.pdf+html
2.7.1.52 - Fucokinase	r12a	Michaelis-Menten kinetics	Random order bi-bi (assumed)						37°C, rattus norvegicus, liver	http://informahealthcare.com/doi/abs/10.3109/14756369709027655
2.7.7.30 - fucose-1-phosphate guanylyltransferase	r13aF	Fucose-1-P	Ping-Pong bi-bi mechanism (assumed)	0.067 mM	3.6 /s				37°C, pH 7.0, homo sapiens, liver	http://pubs.acs.org/doi/abs/10.1021/bi0503605	different kcat values and analogy to UDP-GlcNAc point towards ping-pong mechanism
2.7.7.30 - fucose-1-phosphate guanylyltransferase	r13aF	GTP	Ping-Pong bi-bi mechanism (assumed)	0.05 mM	2.5 /s				37°C, pH 7.0, homo sapiens, liver	http://pubs.acs.org/doi/abs/10.1021/bi0503605
2.7.7.30 - fucose-1-phosphate guanylyltransferase	r13aB	GDP-fucose	Ping-Pong bi-bi mechanism (assumed)	0.120 mM	(overall value assumed to be same as forward)				37°C, pH 7.8, sus scrofa, kidney	http://www.jbc.org/content/273/46/30165.full.pdf+html	Activity data seems to appear as two parallel lines suggesting a ping-pong mechanism
2.7.7.30 - fucose-1-phosphate guanylyltransferase	r13aB	PPi	Ping-Pong bi-bi mechanism (assumed)	0.135 mM					37°C, pH 7.8, sus scrofa, kidney	http://www.jbc.org/content/273/46/30165.full.pdf+html	Overall kcat=(kF*kG/(kF+kG)) = 1.5 /s
1.1.1.271 - GDP-L-fucose synthase	r14a	GDP-4-keto-6-deoxy-D-mannose	Ping-Pong bi-bi mechanism	0.014 mM	0.20 /s (from activity)		194 nmol/min/mg		37°C, pH 7, sus scrofa	http://www.jbc.org/content/263/4/1693.full.pdf	Apparent homogeneity of protein and an Mr of 63.1 kDa
1.1.1.271 - GDP-L-fucose synthase	r14a	NADPH	Ping-Pong bi-bi mechanism	0.023 mM					37°C, pH 7.8, sus scrofa, kidney	http://www.jbc.org/content/263/4/1693.full.pdf
1.1.1.271 - GDP-L-fucose synthase	r14a	NADPH (substrate inhibition at high concentrations)	Ping-Pong bi-bi mechanism						37°C, pH 7.8, sus scrofa, kidney	http://www.jbc.org/content/263/4/1693.full.pdf
4.2.1.47 - GDP-mannose 4,6-dehydratase	r15a	GDP-Mannose	Random order bi-bi (assumed)	0.0035 mM			700 nmol/min/mg		37°C, pH 8.0, homo sapiens, expressed in E. Coli	http://www.sciencedirect.com/science/article/pii/S0014579398006152
4.2.1.47 - GDP-mannose 4,6-dehydratase	r15a	NADP	Random order bi-bi (assumed)	0.0036 mM	0.8 /s				37°C, pH 8.0, homo sapiens, expressed in E. Coli	http://www.sciencedirect.com/science/article/pii/S0014579399009825
4.2.1.47 - GDP-mannose 4,6-dehydratase	r15a	GDP-L-fucose (non-competitive inhibition)	Random order bi-bi (assumed)			0.011 mM			37°C, pH 8.0, homo sapiens, expressed in E. Coli	http://www.sciencedirect.com/science/article/pii/S0014579399009825
2.7.7.13 - mannose-1-phosphate guanylyltransferase	r16aF	Mannose-1-P	Ping-Pong bi-bi mechanism (assumed to be the same as for r6a and r14a)	0.13 mM	78 /s (based on Keq)				37°C, pH 7.5, sus scrofa, liver	http://www.jbc.org/content/268/24/17943.long	Keq = 0.38 = (GDP-Man*Ppi)/(GTP*Man-1P)
2.7.7.13 - mannose-1-phosphate guanylyltransferase	r16aF	GTP	Ping-Pong bi-bi mechanism (assumed to be the same as for r6a and r14a)	0.10 mM					37°C, pH 7.5, sus scrofa, liver	http://www.jbc.org/content/268/24/17943.long
2.7.7.13 - mannose-1-phosphate guanylyltransferase	r16aF	Glucose-1-P (competitive with Man-1P)	Ping-Pong bi-bi mechanism (assumed to be the same as for r6a and r14a)			2.5 mM			37°C, pH 7.5, sus scrofa, liver	http://www.jbc.org/content/268/24/17943.long
2.7.7.13 - mannose-1-phosphate guanylyltransferase	r16aB	GDP-mannose	Ping-Pong bi-bi mechanism (assumed to be the same as for r6a and r14a)	0.020 mM	69 /s (from activity)		9250 nmol/min/mg		37°C, pH 7.5, sus scrofa, liver	http://www.jbc.org/content/268/24/17943.long
2.7.7.13 - mannose-1-phosphate guanylyltransferase	r16aB	PPi	Ping-Pong bi-bi mechanism (assumed to be the same as for r6a and r14a)	0.031 mM					37°C, pH 7.5, sus scrofa, liver	http://www.jbc.org/content/268/24/17943.long	Apparent homogeneity of protein and Mr of 450 kDa
5.4.2.8 - phosphomannomutase	r17aF	Man-6-P	Single substrate M-M with allosteric activator	0.074 mM	24 /s (assumed same as backward)				Oryctolagus cuniculus	http://www.brenda-enzymes.info/literature/lit.php4?e=5.4.2.8&r=3352
5.4.2.8 - phosphomannomutase	r17aF	Glucose-6-P (competitive with Man-6P)	Single substrate M-M with allosteric activator		0.049 mM (assumed same ratio as Man6P to Man1P)				30°C, pH 7.1, homo sapiens, lymphocytes	http://www.ncbi.nlm.nih.gov/pmc/articles/PMC1220145/
5.4.2.8 - phosphomannomutase	r17aB	Mannose-1-P	Single substrate M-M with allosteric activator	0.018 mM	24 /s (from activity)		49 000 nmol/min/mg		30°C, pH 7.1, homo sapiens, lymphocytes	http://www.ncbi.nlm.nih.gov/pmc/articles/PMC1220145/	Apparent homogeneity of protein and Mr of 28 kDa
5.4.2.8 - phosphomannomutase	r17aB	Glucose-1-P (competitive with Man-1P)	Single substrate M-M with allosteric activator		0.012 mM				30°C, pH 7.1, homo sapiens, lymphocytes	http://www.ncbi.nlm.nih.gov/pmc/articles/PMC1220145/
5.4.2.8 - phosphomannomutase	r17a	Hex-1,6-PP co-substrate required for activation	Single substrate M-M with allosteric activator	0.00046 mM (Kdiss)					30°C, pH 7.1, homo sapiens, lymphocytes	http://www.ncbi.nlm.nih.gov/pmc/articles/PMC1220145/pdf/10085245.pdf	0.30 mol/mol phosphorylation stoichometry
2.7.1.1 - Hexokinase	r18a	Mannose	Ordered bi-bi mechanism	0.06 mM					30°C, pH 7.5, rattus norvegicus, skeletal muscle	http://www.sciencedirect.com/science/article/pii/S0076687982900982
2.7.1.1 - Hexokinase	r18a	ATP (Binds before glucose)	Ordered bi-bi mechanism	0.8 mM					29°C, pH 8.0, rattus norvegicus, skeletal muscle	http://www.biochemj.org/bj/100/0739/1000739.pdf
2.7.1.1 - Hexokinase	r18a	D-Glucose	Ordered bi-bi mechanism				120 µM/min/mg protein		30°C, pH 7.5, rattus norvegicus, skeletal muscle	http://www.sciencedirect.com/science/article/pii/S0076687982900982
2.7.1.1 - Hexokinase	r18a	ATP	Ordered bi-bi mechanism		53.2 /s (assumed same for Man reactio)				37°C, pH 7.4, mus musculus	http://www.jbc.org/content/282/18/13906.full.pdf+html
2.7.1.1 - Hexokinase	r18a	Glucose (competitive with Man)	Ordered bi-bi mechanism			0.11 mM			29°C, pH 8.0, rattus norvegicus, skeletal muscle	http://www.biochemj.org/bj/100/0739/1000739.pdf
2.7.1.1 - Hexokinase	r18a	Fructose (competitive with Man)	Ordered bi-bi mechanism			0.9 mM			30°C, pH 7.5, rattus norvegicus, skeletal muscle	http://www.sciencedirect.com/science/article/pii/S0076687982900982
2.7.1.1 - Hexokinase	r18a	Glucosamine (competitive with Man)	Ordered bi-bi mechanism			0.06 mM			30°C, pH 7.5, rattus norvegicus, skeletal muscle	http://www.sciencedirect.com/science/article/pii/S0076687982900982
2.7.1.1 - Hexokinase	r18a	Glc6 (non-competitive with hexose)	Ordered bi-bi mechanism			0.026 mM			30°C, pH 7.5, Rattus norvegicus	http://ac.els-cdn.com/S0076687982900982/1-s2.0-S0076687982900982-main.pdf?_tid=06f150b839f8719f984c766779abb6de&acdnat=1336482973_8a49f0e1aa7bef0ec914ad9555cbd118
2.7.1.1 - Hexokinase	r18a	Glc6 (non-competitive with ATP)	Ordered bi-bi mechanism			0.015 mM			30°C, pH 7.5, Rattus norvegicus	http://ac.els-cdn.com/S0076687982900982/1-s2.0-S0076687982900982-main.pdf?_tid=06f150b839f8719f984c766779abb6de&acdnat=1336482973_8a49f0e1aa7bef0ec914ad9555cbd118
2.7.1.1 - Hexokinase	r18a	Glc6 (enzyme only)	Ordered bi-bi mechanism			0.043 mM			30°C, pH 7.5, Rattus norvegicus	http://ac.els-cdn.com/S0076687982900982/1-s2.0-S0076687982900982-main.pdf?_tid=06f150b839f8719f984c766779abb6de&acdnat=1336482973_8a49f0e1aa7bef0ec914ad9555cbd118
2.7.1.1 - Hexokinase	r18a	ADP (competitive with ATP)	Ordered bi-bi mechanism			3.5 mM			30°C, pH 7.5, Rattus norvegicus	http://ac.els-cdn.com/S0076687982900982/1-s2.0-S0076687982900982-main.pdf?_tid=06f150b839f8719f984c766779abb6de&acdnat=1336482973_8a49f0e1aa7bef0ec914ad9555cbd118
2.7.1.2 - Glucokinase	r18b	Mannose	Ordered bi-bi mechanism	4.4 mM					30°C, pH 7.5, Homo Sapiens, liver	http://www.jbc.org/content/270/17/9939.long
2.7.1.2 - Glucokinase	r18b	ATP	Ordered bi-bi mechanism	0.63 mM					30°C, pH 7.5, Homo Sapiens, liver	http://www.jbc.org/content/270/17/9939.long
2.7.1.2 - Glucokinase	r18b	D-glucose (competitive with Hexose)	Ordered bi-bi mechanism			6.0 mM			30°C, pH 7.5, Homo Sapiens, liver	http://www.jbc.org/content/270/17/9939.long
2.7.1.2 - Glucokinase	r18b	Glc6P (competitive with Hexose)	Ordered bi-bi mechanism			12 mM			30°C, pH 7.5, Homo Sapiens, liver	http://www.jbc.org/content/270/17/9939.long
2.7.1.2 - Glucokinase	r18b	GlcNAc (competitive with Hexose	Ordered bi-bi mechanism			0.20 mM			30°C, pH 7.5, Homo Sapiens, liver	http://www.jbc.org/content/270/17/9939.long
2.7.1.2 - Glucokinase	r18b	ADP (competitive with ATP)	Ordered bi-bi mechanism			9.0 mM			30°C, pH 8.0, Rattus norvegicus, liver	http://www.ncbi.nlm.nih.gov/pmc/articles/PMC1164869/pdf/biochemj00507-0070.pdf
2.7.1.2 - Glucokinase	r18b				66.7 /s				30°C, pH 7.5, Homo Sapiens, liver	http://www.jbc.org/content/269/44/27458.full.pdf
5.3.1.8 - Mannose-6-phosphate isomerase	19aF	Fru-6P	Single substrate Michaelis-Menten kinetics (assumed)	0.031 mM	56 /s (assumed same as backward)				25°C, pH 8.0, oryctolagus cuniculus, skeletal muscle	http://www.jbc.org/content/235/8/2178.long
5.3.1.8 - Mannose-6-phosphate isomerase	19aF	Fru-6P	Single substrate Michaelis-Menten kinetics (assumed)	0.10 mM					25°C, pH 8.0, oryctolagus cuniculus, skeletal muscle	http://www.jbc.org/content/235/8/2178.long
5.3.1.8 - Mannose-6-phosphate isomerase	19aB	Man-6-P	Single substrate Michaelis-Menten kinetics (assumed)	0.25 mM	56 /s (from activity)		75 µM/min/mg protein		37°C, pH 8.0, homo sapiens, placenta	http://onlinelibrary.wiley.com/doi/10.1111/j.1432-1033.1994.tb19954.x/pdf	Apparent homogeneity of protein and Mr of 45 kDa
5.3.1.8 - Mannose-6-phosphate isomerase	19aB	Fru-1P (competitive inhibitor)	Single substrate Michaelis-Menten kinetics (assumed)			0.03 mM			30°C, pH 7.1, rattus norvegicus, liver	http://www.nature.com/pr/journal/v40/n5/full/pr19962957a.html
2.7.1.6 - galactokinase	r20a	galactose (second to bind)	Ordered bi-bi mechanism	0.97	8.7 /s				37°C, pH 8.0, homo sapiens	http://www.sciencedirect.com/science/article/pii/S016816560900128X
2.7.1.6 - galactokinase	r20a	ATP (first to bind)	Ordered bi-bi mechanism	0.034					37°C, pH 8.0, homo sapiens	http://www.sciencedirect.com/science/article/pii/S016816560900128X
2.7.1.6 - galactokinase	r20a	Gal-1-P (uncompetitive with respect to ATP)	Ordered bi-bi mechanism			39 mM			37°C, pH 8.0, homo sapiens	http://onlinelibrary.wiley.com/resolve/openurl?genre=article&sid=nlm:pubmed&issn=0014-2956&date=2003&volume=270&issue=8&spage=1767
2.7.1.6 - galactokinase	r20a	Gal-1-P (uncompetitive with respect to Gal)	Ordered bi-bi mechanism			28 mM			37°C, pH 8.0, homo sapiens	http://onlinelibrary.wiley.com/resolve/openurl?genre=article&sid=nlm:pubmed&issn=0014-2956&date=2003&volume=270&issue=8&spage=1767
2.7.1.6 - galactokinase	r20a	ADP (competitive with ATP)	Ordered bi-bi mechanism			0.2 mM			37°C, pH 7.8, sus scrofa, liver	http://www.sciencedirect.com/science/article/pii/0076687975420900
2.7.1.6 - galactokinase	r20a	AMP	Ordered bi-bi mechanism			10.2 mM			34°C, pH 7.5, rattus norvegicus, liver	http://www.sciencedirect.com/science/article/pii/S016816560900128X
2.7.7.9 - UTP-glucose-1-phosphate uridylyltransferase	r21aF	Galactose-1-P (second to bind)	Ordered bi-bi mechanism	7.3 mM	170 /s (assumed same as backwards)				32°C, pH 8.0, Oryctolagus cuniculus, liver	http://www.jbc.org/content/249/23/7695.long
2.7.7.9 - UTP-glucose-1-phosphate uridylyltransferase	r21aF	Galactose-1-P (second to bind)	Ordered bi-bi mechanism	1.9 mM	170 /s (assumed same as backwards)				25°C, pH 8.0, homo sapiens, transfected cell line	http://glycob.oxfordjournals.org/content/13/4/285.full.pdf
2.7.7.9 - UTP-glucose-1-phosphate uridylyltransferase	r21aF	UTP (First to bind)	Ordered bi-bi mechanism	0.038 mM	612000				32°C, pH 8.0, Oryctolagus cuniculus, liver	http://www.jbc.org/content/249/23/7695.long
2.7.7.9 - UTP-glucose-1-phosphate uridylyltransferase	r21aF	Glucose 1-P (competitive with Gal-1P)	Ordered bi-bi mechanism			0.046 mM			32°C, pH 8.0, Oryctolagus cuniculus, liver	http://www.jbc.org/content/249/23/7695.long
2.7.7.9 - UTP-glucose-1-phosphate uridylyltransferase	r21aF	UDP-Galactose (competitive with Gal-1P)	Ordered bi-bi mechanism			0.22 mM			32°C, pH 8.0, Oryctolagus cuniculus, liver	http://www.jbc.org/content/249/23/7695.long
2.7.7.9 - UTP-glucose-1-phosphate uridylyltransferase	r21aB	UDP-Galactose	Ordered bi-bi mechanism	0.22 mM	170 /s (from activity)				32°C, pH 8.0, Oryctolagus cuniculus, liver	http://www.jbc.org/content/249/23/7695.long
2.7.7.9 - UTP-glucose-1-phosphate uridylyltransferase	r21aB	PPi	Ordered bi-bi mechanism	0.21 mM	612000				32°C, pH 8.0, homo sapiens, liver	http://www.jbc.org/content/249/23/7695.long
2.7.7.9 - UTP-glucose-1-phosphate uridylyltransferase	r21aB	UDP-glucose (competitive with UDP-Gal)	Ordered bi-bi mechanism			0.066 mM	200 µM/min/mg protein		32°C, pH 8.0, Oryctolagus cuniculus, liver	http://www.jbc.org/content/249/23/7695.long	Apparent homogeneity of protein and Mr of 50kDa
2.7.7.9 - UTP-glucose-1-phosphate uridylyltransferase	r21aB	Galactose-1-P (competitive with UDP-Gal)	Ordered bi-bi mechanism			1.9 mM			25°C, pH 8.0, homo sapiens, transfected cell line	http://glycob.oxfordjournals.org/content/13/4/285.full.pdf
2.7.7.9 - UTP-glucose-1-phosphate uridylyltransferase	r21a		Ordered bi-bi mechanism						Homo sapiens and bos taurus	http://www.jbc.org/content/246/8/2551.full.pdf
5.1.3.2 - UDP-glucose 4-epimerase	r22aF	UDP-Gal	Single substrate Michaelis-Menten mechanism		6 /s (assumed same as backwards)				37°C, pH 8.8, homo sapiens,	http://onlinelibrary.wiley.com/doi/10.1111/j.1742-4658.2005.05017.x/abstract;jsessionid=C0635FE9C5F7B25D64C931F1993F6492.d02t02
5.1.3.2 - UDP-glucose 4-epimerase	r22aF	UDP-Gal	Single substrate Michaelis-Menten mechanism	0.048 mM		21600			37°C, pH 7.5, homo sapiens,	http://www.sciencedirect.com/science/article/pii/S0300908411002057
5.1.3.2 - UDP-glucose 4-epimerase	r22aF	UDP-galactose	Single substrate Michaelis-Menten mechanism		36 /s				37°C, pH 8.8, homo sapiens	http://onlinelibrary.wiley.com/doi/10.1111/j.1742-4658.2005.05017.x/pdf
5.1.3.2 - UDP-glucose 4-epimerase	r22aF	UDP-GalNAc (competes with UDP-Gal)	Single substrate Michaelis-Menten mechanism			0.29 mM			37°C, pH 8.7, homo sapiens, expressed in Saccharomyces	http://www.jbc.org/content/279/31/32796.full.pdf
5.1.3.2 - UDP-glucose 4-epimerase	r22aB	UDP-Glc	Single substrate Michaelis-Menten mechanism	Estimated					Homo sapiens, expressed in Saccharomyces	http://www.sciencedirect.com/science/article/pii/S1074552102000935
5.1.3.2 - UDP-glucose 4-epimerase	r22aB	UDP-GlcNAc (competes with UDP-Glc)	Single substrate Michaelis-Menten mechanism			0.53 mM (based on UDP-GalNAc/UDP-GlcNAc ratio)			37°C, pH 7.8, CHO-K1	http://onlinelibrary.wiley.com/doi/10.1002/bit.21816/abstract	An average UDP-GalNAc/UDP-GlcNAc of 0.551 was calculated
2.7.7.12 - UDP-glucose-hexose-1-phosphate uridylyltransferase	r23a	UDP-Glucose	Bi-bi double displacement reaction (following ping pong kinetics)	0.6 mM (Ka)	98 /s				37°C, pH 8.7, homo sapiens, expressed in yeast	http://www.jbc.org/content/275/30/22847.full.pdf+html
2.7.7.12 - UDP-glucose-hexose-1-phosphate uridylyltransferase	r23a	UDP-Glucose	Bi-bi double displacement reaction (following ping pong kinetics)	0.2 mM (Kia)					37°C, pH 8.7, homo sapiens, expressed in yeast	http://www.jbc.org/content/275/30/22847.full.pdf+html
2.7.7.12 - UDP-glucose-hexose-1-phosphate uridylyltransferase	r23a	Gal-1-P	Bi-bi double displacement reaction (following ping pong kinetics)	0.4 mM (Kb)					37°C, pH 8.7, homo sapiens, expressed in yeast	http://www.jbc.org/content/275/30/22847.full.pdf+html
5.4.2.8 - phosphomannomutase	r26aF	Glucose-6-P	Ping-Pong bi-bi mechanism	0.049 mM (assumed same ratio as Man6P to Man1P)	1.2 /s (assumed same as backward)				30°C, pH 7.1, homo sapiens, lymphocytes	http://www.ncbi.nlm.nih.gov/pmc/articles/PMC1220145/
5.4.2.8 - phosphomannomutase	r26aF	Mannose-6-P (competitive with Glc-6P)	Ping-Pong bi-bi mechanism			0.074 mM			Oryctolagus cuniculus	http://www.brenda-enzymes.info/literature/lit.php4?e=5.4.2.8&r=3352
5.4.2.8 - phosphomannomutase	r26aB	Glucose-1-P	Ping-Pong bi-bi mechanism	0.012 mM	1.2 /s (20 times less activity than Man-1P)				30°C, pH 7.1, homo sapiens, lymphocytes	http://www.ncbi.nlm.nih.gov/pmc/articles/PMC1220145/
5.4.2.8 - phosphomannomutase	r26aB	Mannose-1-P (competitive with Glc-1P)	Ping-Pong bi-bi mechanism			0.018 mM			30°C, pH 7.1, homo sapiens, lymphocytes	http://www.ncbi.nlm.nih.gov/pmc/articles/PMC1220145/	Apparent homogeneity of protein and Mr of 28 kDa
5.4.2.8 - phosphomannomutase	r26a	hex-1,6-PP co-substrate required for activation	Ping-Pong bi-bi mechanism	0.003 mM			0.0493333		Mammals	http://www.sciencedirect.com/science/article/pii/S0014579396014251	Acitvation assumed to be not limiting
5.4.2.2 - phosphoglucomutase	r26bF	Glucose-6-P	Single substrate Michaelis-Menten mechanism	0.057 mM	57 /s				30°C, pH 7.4, Oryctolagus cuniculus, liver	http://www.sciencedirect.com/science/article/pii/S0003269704002258
5.4.2.2 - phosphoglucomutase	r26bB	Glucose-1-P	Single substrate Michaelis-Menten mechanism	0.011 mM	181 /s		160 µM/min/mg		37°C, pH 7.4, Oryctolagus cuniculus, liver	http://www.sciencedirect.com/science/article/pii/S0003269704002258
5.4.2.3 - phosphoacetylglucosamine mutase	r26cF	Glc-6-P	Ping-Pong bi-bi mechanism	1.3 mM (assumed same ratio as GlcNAc-1P to GlcNAc-6P)	1.8 /s (assumed same as for GlcNAc-6P)				30°C, pH 8.3, homo sapiens, erythrocyte	http://www.sciencedirect.com/science/article/pii/S0167478100001202
5.4.2.3 - phosphoacetylglucosamine mutase	r26cF	Glc-1,6-P (intermediate)	Ping-Pong bi-bi mechanism	0.278 mM					37°C, pH 7.5, sus scrofa, submaxillary gland	http://www.jbc.org/content/254/17/8353.long
5.4.2.3 - phosphoacetylglucosamine mutase	r26cF	GlcNAc-1,6-P2	Ping-Pong bi-bi mechanism			0.00083			37°C, pH 7.5, sus scrofa, submaxillary gland	http://www.jbc.org/content/254/17/8353.long
5.4.2.3 - phosphoacetylglucosamine mutase	r26cF	GlcNAc-6-P	Ping-Pong bi-bi mechanism			0.046 mM			30°C, pH 8.3, homo sapiens, expressed in E. Coli	http://www.sciencedirect.com/science/article/pii/S0167478100001202
5.4.2.3 - phosphoacetylglucosamine mutase	r26cB	Glc-1-P	Ping-Pong bi-bi mechanism	0.66 mM	1.8 /s (assumed same as forward)				37°C, pH 7.5, sus scrofa, submaxillary gland	http://www.jbc.org/content/254/17/8353.long
5.4.2.3 - phosphoacetylglucosamine mutase	r26cB	GlcNAc-1-P	Ping-Pong bi-bi mechanism			0.023 mM			37°C, pH 7.5, sus scrofa, submaxillary gland	http://www.jbc.org/content/254/17/8353.long
2.7.7.9 - UTP-glucose-1-phosphate uridylyltransferase	r27aF	Glucose 1-P (second to bind)	Ordered bi-bi mechanism	0.046 mM	170 /s (assumed same as backward)				32°C, pH 8.0, Oryctolagus cuniculus, liver	http://www.jbc.org/content/249/23/7695.long
2.7.7.9 - UTP-glucose-1-phosphate uridylyltransferase	r27aF	UTP (first to bind)	Ordered bi-bi mechanism	0.038 mM					32°C, pH 8.0, Oryctolagus cuniculus, liver	http://www.jbc.org/content/249/23/7695.long
2.7.7.9 - UTP-glucose-1-phosphate uridylyltransferase	r27aF	Galactose-1-P	Ordered bi-bi mechanism			7.3 mM			32°C, pH 8.0, Oryctolagus cuniculus, liver	http://www.jbc.org/content/249/23/7695.long
2.7.7.9 - UTP-glucose-1-phosphate uridylyltransferase	r27aF	Galactose-1-P	Ordered bi-bi mechanism			0.47 mM			25°C, pH 8.0, homo sapiens, transfected cell line	http://glycob.oxfordjournals.org/content/13/4/285.full.pdf
2.7.7.9 - UTP-glucose-1-phosphate uridylyltransferase	r27aB	UDP-glucose	Ordered bi-bi mechanism	0.066 mM	170 /s (from activity)				32°C, pH 8.0, Oryctolagus cuniculus, liver	http://www.jbc.org/content/249/23/7695.long
2.7.7.9 - UTP-glucose-1-phosphate uridylyltransferase	r27aB	PPi	Ordered bi-bi mechanism	0.21 mM					32°C, pH 8.0, homo sapiens, liver	http://www.jbc.org/content/249/23/7695.long
2.7.7.9 - UTP-glucose-1-phosphate uridylyltransferase	r27aB	UDP-Galactose	Ordered bi-bi mechanism			0.22 mM			32°C, pH 8.0, Oryctolagus cuniculus, liver	http://www.jbc.org/content/249/23/7695.long
2.7.7.9 - UTP-glucose-1-phosphate uridylyltransferase	r27a		Ordered bi-bi mechanism						Homo sapiens and bos taurus	http://www.jbc.org/content/246/8/2551.full.pdf
1.1.1.22 - UDP-glucose 6-dehydrogenase	r28a	UDP-Glucose	Rate constant 110.7 nmol/min/mg	0.011 mM	0.10 /s		110 nmol/min/mg		room temp, ph 7.4, homo sapiens, expressed in E. Coli	http://www.jbc.org/content/279/22/23590.full.pdf	Apparent homogeneity of protein and Mr of 57 kDa
1.1.1.22 - UDP-glucose 6-dehydrogenase	r28a	NAD+		0.355 mM					room temp, ph 7.4, homo sapiens, expressed in E. Coli	http://www.jbc.org/content/279/22/23590.full.pdf
		UDP-GlcA is a weak competitive inhibitor with respect to UDP-Glc								http://www.brenda-enzymes.info/literature/lit.php4?e=1.1.1.22&r=286296
5.1.3.14 - UDP-N-acetylglucosamine 2-epimerase	r29a	UDP-GlcNAc	Single substrate Michaelis-Menten kinetics (ordered two step mechanism)	0.011 mM	2.3 /s (based on activity)			0.45	37°C, pH 7.5, rattus norvegicus	http://www.jbc.org/content/272/39/24313.full.pdf	Based on homogeneous hexamer structure and Mr of 75kDa for monomer
5.1.3.14 - UDP-N-acetylglucosamine 2-epimerase	r29a	CMP-Neu5Ac (non-competitive)	Single substrate Michaelis-Menten kinetics (ordered two step mechanism)						xx°C, pH 7.4, rattus norvegicus	http://www.pnas.org/content/52/2/371.full.pdf	Co-operative inhibition kinetics are not taken into account due to lack of data
5.1.3.14 - UDP-N-acetylglucosamine 2-epimerase	r29a	CMP-Neu5Ac (non-competitive)	Single substrate Michaelis-Menten kinetics (ordered two step mechanism)			0.025		4.1	37°C, pH 7.5, rattus norvegicus	http://www.jbc.org/content/272/39/24313.full.pdf
2.7.1.59 - N-acetylglucosamine kinase	r30a	ManNAc	Random order bi-bi (assumed)	4 mM	68.1 /s (assumed same as for GlcNAc)				37°C, pH 7.5, mus musculus, spleen	http://onlinelibrary.wiley.com/doi/10.1046/j.1432-1327.2000.01360.x/pdf
2.7.1.59 - N-acetylglucosamine kinase	r30a	ATP	Random order bi-bi (assumed)	0.5 mM					37°C, pH 7.5, mus musculus, spleen	http://onlinelibrary.wiley.com/doi/10.1046/j.1432-1327.2000.01360.x/pdf
2.7.1.59 - N-acetylglucosamine kinase	r30a	ADP (competitive with ATP)	Random order bi-bi (assumed)			0.9 mM			37°C, pH 9.0, sus scrofa, liver	http://www.sciencedirect.com/science/article/pii/0005274470902287
2.7.1.59 - N-acetylglucosamine kinase	r30a	GlcNAc	Random order bi-bi (assumed)			0.2 mM			37°C, pH 7.5, mus musculus, spleen	http://onlinelibrary.wiley.com/doi/10.1046/j.1432-1327.2000.01360.x/pdf	Activity: 12 (kidney), 4 (liver)
2.7.1.59 - N-acetylglucosamine kinase	r30a	GlcNAc (co-operative inhibition)	Random order bi-bi (assumed)					1.54	32°C, pH 7.5, rattus norvegicus, kindey and liver	http://www.ncbi.nlm.nih.gov/pmc/articles/PMC1161433/pdf/biochemj00430-0042.pdf
2.7.1.60 - N-acylmannosamine kinase	r30b	ManNAc	Random order bi-bi (assumed)	0.093 mM	5.1 /s (based on activity)			1.42	37°C, pH 7.5, rattus norvegicus, liver	http://www.jbc.org/content/272/39/24313.full.pdf	Based on homogeneous hexamer structure and Mr of 75kDa for monomer
2.7.1.60 - N-acylmannosamine kinase	r30b	ATP	Random order bi-bi (assumed)	1.2 mM				1.3	37°C, pH 7.5, rattus norvegicus, liver	http://www.jbc.org/content/272/39/24313.full.pdf
2.5.1.57 - N-acylneuraminate-9-phosphate synthase	r31a	ManNAc-6-P	Random order bi-bi (assumed)	0.035 mM	0.30 /s		505 nmol/min/mg		37°C, pH 7.5, rattus norvegicus, liver	http://glycob.oxfordjournals.org/content/12/2/65.full.pdf+html	Apparent homogeneity of protein and Mr of 37 kDa
2.5.1.57 - N-acylneuraminate-9-phosphate synthase	r31a	Phosphoenolpyruvate (PEP)	Random order bi-bi (assumed)	0.105 mM					37°C, pH 7.5, rattus norvegicus, liver	http://glycob.oxfordjournals.org/content/12/2/65.full.pdf+html
3.1.3.29 - N-acylneuraminate-9-phosphatase	r32a	Neu5Ac-9-P	Single substrate Michaelis-Menten kinetics	0.09 mM	56 /s				37°C, pH 7.4, homo sapiens, liver	http://glycob.oxfordjournals.org/content/16/2/165.full.pdf+html
2.7.7.43 - N-acylneuraminate cytidylyltransferase	r33a	Neu5Ac	Random order bi-bi (assumed)	1.3 mM	1.9 /s (purification by 241-fold)				37°C, pH 8.0, rattus norvegicus, liver	http://www.jbc.org/content/267/13/9257.long	Apparent homogeneity of protein and Mr of 58 kDa
2.7.7.43 - N-acylneuraminate cytidylyltransferase	r33a	CTP	Random order bi-bi (assumed)	1.5 mM					37°C, pH 8.0, rattus norvegicus, liver	http://www.jbc.org/content/267/13/9257.long
1.14.18.2 - N-acetylneuraminate monooxygenase	r34a	CMP-Neu5Ac	Single substrate Michaelis-Menten kinetics	0.005 mM	7.3 /s (from activity)		6800 nmol/min/mg		37°C, pH 7.5, mus musculus, liver	http://www.jbc.org/content/269/12/9024.full.pdf	Apparent homogeneity of protein and Mr of 64 kDa,
1.14.18.2 - N-acetylneuraminate monooxygenase	r34a	CMP-Neu5Ac	Single substrate Michaelis-Menten kinetics	0.0055 mM	0.13 /s (from activity)		126 nmol/min/mg		37°C, pH 7.4, mus musculus, liver	http://www.springerlink.com/content/u14266135173862p/fulltext.pdf	CMP-Neu5Ac levels may be controlled by varying the amount of enzyme concentration
1.14.18.2 - N-acetylneuraminate monooxygenase	r34a	cytochrome b5	Single substrate Michaelis-Menten kinetics	0.00024 mM					37°C, pH 7.5, mus musculus, sus scorfa	http://glycob.oxfordjournals.org/content/4/5/675	cytochrome b5 activation was not taken into account although rate-limiting in vitro
		Fraction of CMP-Neu5Gc in different bovine tissues								http://ac.els-cdn.com/S0008621500906232/1-s2.0-S0008621500906232-main.pdf?_tid=04c7f4095054418be0253d8d5abeddc3&acdnat=1338379521_b563b86160283e405d51ff1f3377300a
		Fraction of CMP-Neu5Gc in rat and mouse liver								http://onlinelibrary.wiley.com/doi/10.1111/j.1432-1033.1990.tb19391.x/pdf
		Weak product inhibition through Neu5Gc in mouse								http://onlinelibrary.wiley.com/doi/10.1111/j.1432-1033.1992.tb16925.x/pdf
		Biosynthesis of sialic acids in murine myeloma cells (90% Neu5Gc at steady state)								http://www.jbc.org/content/264/34/20216.full.pdf
4.1.3.3 - N-acetylneuraminate lyase	r37a	Neu5Ac	Single substrate Michaelis-Menten kinetics	1.7 mM	0.93 /s		1548 nmol/min/mg		37°C, pH 7.4, sus scrofa, liver	http://www.springerlink.com/content/g6w13635t1u4n70j/	Apparent homogeneity of protein and Mr of 36 kDa
4.1.3.3 - N-acetylneuraminate lyase	r37a	pyruvate (competitive)	Single substrate Michaelis-Menten kinetics			1.2 mM			37°C, pH 7.4, homo sapiens	http://www.sciencedirect.com/science/article/pii/S0300908402014360
5.1.3.8 - N-Acylglucosamine 2-epimerase	r38aF	ManNAc	Single substrate Michaelis-Menten kinetics	12.8 mM	27 /s (from activity)		35800 nmol/min/mg		37°C, pH 7.5, homo sapiens, kidney	http://jb.oxfordjournals.org/content/125/2/348.long
5.1.3.8 - N-Acylglucosamine 2-epimerase	r38aB	GlcNAc	Single substrate Michaelis-Menten kinetics	21.3 mM	3.4 /s (from activity ratio)				37°C, pH 7.5, homo sapiens, kidney	http://jb.oxfordjournals.org/content/125/2/348.long	Apparent homogeneity of protein and Mr of 45 kDa
5.1.3.8 - N-Acylglucosamine 2-epimerase	r38a	ATP (activator)	Single substrate Michaelis-Menten kinetics	0.13 mM					37°C, pH 7.5, homo sapiens, kidney	http://jb.oxfordjournals.org/content/125/2/348.long
2.7.7.23 - UDP-N-acetylglucosamine diphsophorylase	r39aF	UTP (binds second)	Ping-Pong bi-bi mechanism	0.42 mM					37°C, pH 7.5, sus scrofa, liver	http://www.jbc.org/content/271/22/13147.full.pdf+html
2.7.7.23 - UDP-N-acetylglucosamine diphsophorylase	r39aF	GalNAc-1-P (binds first)	Ping-Pong bi-bi mechanism	1.1 mM					37°C, pH 7.5, sus scrofa, liver	http://www.jbc.org/content/271/22/13147.full.pdf+html
2.7.7.23 - UDP-N-acetylglucosamine diphsophorylase	r39aF	GalNAc-1-P	Ping-Pong bi-bi mechanism		73 /s (as calculated from specific activity)					http://www.jbc.org/content/275/2/1433.full.pdf
2.7.7.23 - UDP-N-acetylglucosamine diphsophorylase	r39aF	GlcNAc-1-P (competes with GalNAc-1-P)	Ping-Pong bi-bi mechanism			0.29 mM			37°C, pH 7.5, sus scrofa, liver	http://www.jbc.org/content/271/22/13147.full.pdf+html
2.7.7.23 - UDP-N-acetylglucosamine diphsophorylase	r39aF	Glc-1-P (competes with GalNAc-1-P)	Ping-Pong bi-bi mechanism			5.8 mM			37°C, pH 7.5, sus scrofa, liver	http://www.jbc.org/content/271/22/13147.full.pdf+html
2.7.7.23 - UDP-N-acetylglucosamine diphsophorylase	r39aB	UDP-GalNAc	Ping-Pong bi-bi mechanism	2.2 mM	73 /s (assumed same as for GalNAc-1P)				37°C, pH 8.5, sus scrofa, liver	http://www.jbc.org/content/271/22/13147.full.pdf+html
2.7.7.23 - UDP-N-acetylglucosamine diphsophorylase	r39aB	ADP	Ping-Pong bi-bi mechanism	0.79 mM					37°C, pH 7.4, ovis aries, brain	http://www.brenda-enzymes.org/literature/lit.php4?e=2.7.7.23&r=643057
2.7.7.23 - UDP-N-acetylglucosamine diphsophorylase	r39aB	UDP-GlcNAc (competes with UDP-GalNAc)	Ping-Pong bi-bi mechanism			0.23 mM			37°C, pH 8.5, sus scrofa, liver	http://www.jbc.org/content/271/22/13147.full.pdf+html
2.7.7.23 - UDP-N-acetylglucosamine diphsophorylase	r39aB	UDP-Glc (competes with UDP-GlcNAc)	Ping-Pong bi-bi mechanism			6.3 mM			37°C, pH 8.5, sus scrofa, liver	http://www.jbc.org/content/271/22/13147.full.pdf+html
2.7.1.157 - N-acetylgalactosamine kinase	r40a	GalNAc (binds second)	Ordered bi-bi mechanism	0.040 mM	1.0 /s				37°C, pH 8.0, homo sapiens, expressed in E. Coli	http://informahealthcare.com/doi/pdfplus/10.3109/14756360903179492
2.7.1.157 - N-acetylgalactosamine kinase	r40a	ATP (binds first)	Ordered bi-bi mechanism	0.014 mM					37°C, pH 8.0, homo sapiens, expressed in E. Coli	http://informahealthcare.com/doi/pdfplus/10.3109/14756360903179492
Nucleotide thriphosphate concentrations									Rat liver	http://www.jbc.org/content/249/1/211.full.pdf+html
NSD - Transporters
CMP-Neu5Ac - Transporter		CMP-Neu5Ac	Single substrate Michaelis-Menten kinetics (simplified from anti-port kinetics)	0.0013 mM	6.6
CMP-Neu5Gc - Transporter		CMP-Neu5Gc	Single substrate Michaelis-Menten kinetics (simplified from anti-port kinetics)	0.0013 mM	6.6						Same kinetic data assumed as for CMP-Neu5Ac
GDP-Fuc - Transporter		GDP-Fuc	Single substrate Michaelis-Menten kinetics (simplified from anti-port kinetics)	0.0075 mM	2.2
GDP-Man - Transporter		GDP-Man	Single substrate Michaelis-Menten kinetics (simplified from anti-port kinetics)	0.0075 mM	2.2						Same kinetic data assumed as for GDP-Fuc
UDP-Gal - Transporter		UDP-Gal	Single substrate Michaelis-Menten kinetics (simplified from anti-port kinetics)	0.0024 mM	11.5
UDP-GalNAc - Transporter		UDP-GalNAc	Single substrate Michaelis-Menten kinetics (simplified from anti-port kinetics)	0.0071 mM	18.1					http://onlinelibrary.wiley.com/doi/10.1002/btpr.470/pdf	Same kinetic data assumed as for UDP-GlcNAc
UDP-Glc - Transporter		UDP-Glc	Single substrate Michaelis-Menten kinetics (simplified from anti-port kinetics)	0.0024 mM	11.5						Same kinetic data assumed as for UDP-Gal
UDP-GlcA - Transporter		UDP-GlcA	Single substrate Michaelis-Menten kinetics (simplified from anti-port kinetics)	0.0024 mM	11.5						Same kinetic data assumed as for UDP-Gal
UDP-GlcNAc - Transporter		UDP-GlcNAc	Single substrate Michaelis-Menten kinetics (simplified from anti-port kinetics)	0.0071 mM	18.1					http://onlinelibrary.wiley.com/doi/10.1002/btpr.470/pdf
